# Supplementary material for: Triterpenoid and Steroid Content of Lipophilic Extracts of Selected Medicinal Plants of the Mediterranean Region
Source: MDPI journal article supplement (doi:10.3390/molecules28020697), 2023-01-10
Supplement: s1 [file s1]

## Triterpenoid and Steroid Content of Lipophilic Extracts of Selected Medicinal Plants of the Mediterranean Region

**Table S1.** Retention times and characteristic ions of mass spectra of identified steroids and triterpenoids

| Retention time | Compound                             | Mass spectrum<br><i>m/z</i> (relative intensity)                                                                                                                                                              |
|----------------|--------------------------------------|---------------------------------------------------------------------------------------------------------------------------------------------------------------------------------------------------------------|
| 34.6           | Campesterol                          | 400 (30), 107 (51), 105 (55), 95 (49), 83 (45), 81 (64), 71 (62), 57 (77), 55 (77), 43 (100), 41 (52)                                                                                                         |
| 35.5           | Stigmasterol                         | 412 (36), 145 (64), 107 (52), 95 (100), 83 (66), 81 (90), 78 (60), 69 (67), 67 (85), 55 (69)                                                                                                                  |
| 37.5           | Sitosterol                           | 414 (29), 145 (54), 107 (59), 105 (60), 95 (54), 91 (49), 81 (57), 57 (68), 55 (70), 43 (100), 41 (44)                                                                                                        |
| 37.8           | $\beta$ -Amyrenone                   | 424 (11), 219 (18), 218 (100), 205 (13), 203 (55), 189 (14), 109 (12), 95 (16), 81 (12), 69 (14), 55 (15)                                                                                                     |
| 38.2           | Germanicol                           | 426 (1), 204 (100), 177 (85), 189 (75), 95 (58), 55 (46), 205 (44), 81 (42), 109 (40), 69 (39), 107 (37)                                                                                                      |
| 38.5           | $\beta$ -Amyrin                      | 426 (27), 219 (18), 218 (100), 203 (49), 189 (17), 135 (11), 109 (13), 105 (12), 95 (15), 81 (18), 69 (14)                                                                                                    |
| 39.5           | $\alpha$ -Amyrenone                  | 424 (12), 219 (19), 218 (100), 203 (24), 189 (16), 135 (19), 133 (18), 122 (18), 119 (17), 95 (16), 55 (18)                                                                                                   |
| 39.4           | $\alpha$ -Amyrin/<br>Lupeol          | 426 (4), 218 (100), 203 (20), 189 (36), 135 (35), 121 (32), 109 (32), 107 (34), 95 (40), 81 (33), 55 (31)<br>426 (18), 207 (67), 189 (90), 135 (83), 121 (80) 109 (85), 121 (80), 95 (100), 93 (87), 81 (86), |
| 40.7           | Tremulone (stigmasta-3,5-dien-7-one) | 410 (32), 187 (27), 174 (100), 161 (37), 159 (26), 91 (28), 57 (28), 55 (37), 43 (44), 41 (28)                                                                                                                |
| 41.9           | Sitostenone                          | 440 (5), 121 (60), 119 (55), 109 (62), 107 (76), 105 (57), 95 (98), 93 (64), 81 (72), 69 (99), 55 (100)                                                                                                       |
| 43.5           | Taraxasterol                         | 426 (14), 207 (57), 189 (100), 135 (51), 121 (74), 109 (57), 107 (62), 95 (70), 93 (47), 81 (48), 67 (43)                                                                                                     |
| 44.0           | Lupeol acetate                       | 468 (8), 189 (100), 135 (63), 121 (76), 109 (71), 107 (78), 95 (77), 93 (80), 81 (68), 69 (53)                                                                                                                |
| 48.0           | Oleanolic aldehyde                   | 440 (2), 232 (28), 207 (20), 204 (39), 203 (100), 189 (29), 105 (18), 81 (19), 69 (20), 55 (29)                                                                                                               |
| 49.9           | Stigmastane-3,6-dione                | 428 (25), 135 (61), 107 (74), 98 (63), 95 (67), 79 (62), 69 (86), 57 (67), 55 (100), 43 (77), 41 (71)                                                                                                         |
| 50.9           | Ursolic aldehyde                     | 440 (1), 207 (26), 204 (23), 203 (100), 133 (42), 119 (18), 105 (18), 95 (18), 81 (18), 55 (18), 43 (20)                                                                                                      |

|                                   |                                            |                                                                                                             |
|-----------------------------------|--------------------------------------------|-------------------------------------------------------------------------------------------------------------|
| 52.7                              | Erythrodiol                                | 442 (1), 204 (17), 203 (100), 133 (7), 119 (9), 105 (8), 95 (9), 93 (8), 81 (8), 69 (9), 55 (8)             |
| 55.7                              | Uvaol                                      | 442 (1), 207 (13), 204 (17), 203 (100), 133 (33), 119 (13), 105 (11), 95 (12), 81 (10), 69 (10), 55 (11)    |
| 57.2                              | Betulin                                    | 442 (8), 203 (100), 189 (77), 133 (66), 121 (55), 107 (57), 105 (49), 95 (56), 93 (54), 81 (67)             |
| Acids analyzed after methylation: |                                            |                                                                                                             |
| 42.0                              | Olean-2,12-dien-28-oic acid methyl ester   | 452(11), 425 (9), 263 (11), 262 (61), 221 (14), 203 (100), 190 (15), 189 (22), 133 (14), 119 (12)           |
| 44.7                              | Ursa-2,12-dien-28-oic acid methyl ester    | 452 (12), 425 (9), 263 (20), 262 (100), 221 (27), 203 (79), 190 (18), 189 (27), 133 (58), 119 (23)          |
| 44.7                              | Moronic acid methyl ester                  | 468 (17), 248 (35), 205 (15), 203 (30), 190 (24), 189 (100), 187 (26), 133 (17), 121 (28), 119 (28)         |
| 46.0                              | 3-Oxo-olean-12-en-28-oic acid methyl ester | 468 (6), 262 (32), 204 (17), 203 (100), 202 (21), 189 (29), 133 (17), 119 (14), 105 (12), 55 (12)           |
| 46.2                              | Morolic acid methyl ester                  | 470 (80), 263 (17), 262 (86), 249 (50), 247 (50), 208 (49), 207 (20), 204 (16), 203 (100), 202 (26)         |
| 46.7                              | Oleanolic acid methyl ester                | 470 (1), 262 (48), 207 (13), 204 (16), 203 (100), 202 (21), 189 (22), 133 (17), 119 (13), 105 (14)          |
| 47.1                              | Betulinic acid methyl ester                | 470 (5), 207 (41), 203 (38), 189 (100), 175 (40), 119 (41), 107 (38), 105 (37), 95 (37), 93 (38)            |
| 47.5                              | 3-Oxo-urs-12-en-28-oic acid methyl ester   | 468 (3), 263 (21), 262 (96), 249 (20), 204 (17), 203 (100), 189 (29), 133 (79), 119 (30), 105 (19)          |
| 49.7                              | Ursolic acid methyl ester                  | 470 (1), 263 (20), 262 (100), 207 (32), 203 (93), 189 (29), 133 (76), 119 (34), 105 (21), 95 (18)           |
| 61.0                              | Maslinic acid methyl ester                 | 486 (2), 263 (10), 262 (53), 204 (17), 203 (100), 202 (20), 189 (20), 133 (16), 119 (13), 105 (12), 69 (10) |
